# Supplementary material
Source: PubMed Central journal article supplement (PMC10575933)
Supplement: 41416_2023_2400_MOESM1_ESM.pdf [file 41416_2023_2400_MOESM1_ESM.pdf]

**SURVEILLANCE AFTER CHILDHOOD CANCER: ARE SURVIVORS WITH AN INCREASED RISK FOR  
CARDIOMYOPATHY REGULARLY FOLLOWED-UP?**

**SUPPLEMENT**

Table S1. Factors associated with long-term adherence to recommended surveillance among survivors at high risk for cardiomyopathy (n=873).

|                                                            | Total number | Adherence, n (%) | Crude RR (95% CI)      | Adjusted RR <sup>a</sup> (95% CI) |
|------------------------------------------------------------|--------------|------------------|------------------------|-----------------------------------|
| <b>Sex</b>                                                 |              |                  |                        |                                   |
| Females (ref)                                              | 385          | 80 (20.8)        | 1                      | 1                                 |
| Males                                                      | 488          | 53 (10.9)        | 0.52 (0.38 to 0.72)*** | 0.57 (0.41 to 0.79)**             |
| <b>Age (years)</b>                                         |              |                  |                        |                                   |
| < 36                                                       | 260          | 41 (15.8)        | 1                      | 1                                 |
| 36-49                                                      | 521          | 76 (14.6)        | 0.93 (0.65 to 1.31)    | 0.86 (0.58 to 1.28)               |
| ≥ 50                                                       | 92           | 16 (17.4)        | 1.10 (0.65 to 1.87)    | 0.83 (0.46 to 1.50)               |
| <b>Deprivation score</b>                                   |              |                  |                        |                                   |
| Quintiles 1 & 2 (ref)                                      | 338          | 55 (16.3)        | 1                      | 1                                 |
| Quintiles 3                                                | 204          | 29 (14.2)        | 0.87 (0.58 to 1.32)    | 0.91 (0.55 to 1.41)               |
| Quintile 4                                                 | 175          | 25 (14.3)        | 0.88 (0.57 to 1.36)    | 0.94 (0.61 to 1.44)               |
| Quintile 5 (most deprived)                                 | 156          | 24 (15.4)        | 0.95 (0.61 to 1.47)    | 1.02 (0.66 to 1.59)               |
| <b>Childhood cancer</b>                                    |              |                  |                        |                                   |
| Wilms Tumour (ref)                                         | 128          | 51 (14.8)        | 1                      | 1                                 |
| Neuroblastoma                                              | 62           | 12 (8.1)         | 0.54 (0.21 to 1.39)    | 0.59 (0.23 to 1.52)               |
| Hodgkin's lymphoma                                         | 51           | 20 (15.7)        | 1.06 (0.49 to 2.26)    | 0.87 (0.40 to 1.89)               |
| Non-Hodgkin's lymphoma                                     | 202          | 56 (11.4)        | 0.77 (0.44 to 1.35)    | 0.77 (0.42 to 1.40)               |
| Soft tissue sarcoma                                        | 133          | 40 (16.5)        | 1.11 (0.63 to 1.96)    | 1.05 (0.60 to 1.84)               |
| Bone sarcoma                                               | 194          | 82 (21.7)        | 1.46 (0.89 to 2.39)    | 1.28 (0.75 to 1.17)               |
| CNS tumour                                                 | 41           | 7 (4.9)          | 0.32 (0.08 to 1.35)    | 0.33 (0.08 to 1.36)               |
| Other solid cancers <sup>b</sup>                           | 62           | 26 (19.4)        | 1.30 (0.68 to 2.51)    | 1.26 (0.64 to 2.48)               |
| <b>Age at diagnosis</b>                                    |              |                  |                        |                                   |
| < 5 years (ref)                                            | 283          | 30 (10.6)        | 1                      | 1                                 |
| ≥ 5 years                                                  | 590          | 103 (17.5)       | 1.65 (1.12 to 2.41)*** | 1.64 (1.08 to 2.48)*              |
| <b>Anthracycline dose &gt;250 mg/m<sup>2</sup></b>         |              |                  |                        |                                   |
| No (ref)                                                   | 124          | 19 (15.3)        | 1                      | -                                 |
| Yes                                                        | 749          | 114 (15.2)       | 0.99 (0.64 to 1.55)    | -                                 |
| <b>Cardiac radiation ≥ 30 Gy to ≥ 10% of the LV volume</b> |              |                  |                        |                                   |
| No (ref)                                                   | 741          | 113 (15.3)       | 1                      | -                                 |
| Yes                                                        | 132          | 20 (15.2)        | 1.00 (0.64 to 1.54)    | -                                 |
| <b>Second cancer</b>                                       |              |                  |                        |                                   |
| No (ref)                                                   | 796          | 114 (14.3)       | 1                      | 1                                 |
| Yes                                                        | 77           | 19 (24.7)        | 1.72 (1.13 to 2.64)*   | 1.49 (0.96 to 2.29)               |

CI, confidence interval; CNS, central nervous system; FDep, French deprivation index; NA, non-available; RR, relative risk; SD, standard deviation.

<sup>a</sup> Adjusted for all other variables in the multivariable modified Poisson regression model.

<sup>b</sup> Gonadal tumour, thyroid tumour, retinoblastoma and other types of carcinoma.

\*, p-value <0.05; \*\*, p-value <0.01; \*\*\*, p-value <0.001.

|                             |                                                 | <b>Anthracycline</b> |                         |                           |                        |
|-----------------------------|-------------------------------------------------|----------------------|-------------------------|---------------------------|------------------------|
|                             |                                                 | ∅                    | 0-100 mg/m <sup>2</sup> | 100-250 mg/m <sup>2</sup> | ≥ 250mg/m <sup>2</sup> |
| <b>Cardiac radiotherapy</b> | ∅ or <30 Gy                                     |                      |                         |                           | <b>HIGH RISK</b>       |
|                             | ≥30 Gy on ]0-10%]<br>of the volume of the<br>LV |                      |                         | <b>HIGH RISK</b>          | <b>HIGH RISK</b>       |
|                             | ≥30 Gy on ≥ 10% of<br>the volume of the LV      | <b>HIGH RISK</b>     | <b>HIGH RISK</b>        | <b>HIGH RISK</b>          | <b>HIGH RISK</b>       |

Figure S1. Definition of survivors at high risk of cardiomyopathy.

LV, left ventricular.
